# Supplementary material for: Near-infrared BODIPY-based two-photon ClO− probe based on thiosemicarbazide desulfurization reaction: naked-eye detection and mitochondrial imaging
Source: Royal Society of Chemistry journal article supplement (doi:10.1039/c7tb01344b), 2017-01-01
Supplement: c7tb01344b1.pdf [file c7tb01344b1.pdf]

## Supporting Information

### **Near-infrared BODIPY two-photon ClO<sup>-</sup> probe based on thiosemicarbazide desulfurization reaction: naked-eye detection and mitochondria imaging**

Bao-xing Shen,<sup>a</sup> Ying Qian,<sup>a</sup> \* Zheng-qing Qi,<sup>b</sup> Chang-gui Lu,<sup>b</sup> Qi Sun,<sup>c</sup> Xiang Xia,<sup>a</sup> Yi-ping Cui<sup>b</sup>

\* Corresponding author. E-mail: yingqian@seu.edu.cn

<sup>a</sup>. School of Chemistry and Chemical Engineering, Southeast University, Nanjing 211189, China

<sup>b</sup>. Advanced Photonic Center, Southeast University, Nanjing 210096, China

<sup>c</sup>. School of Chemistry and Environmental Engineering, Wuhan Institute of Technology, Wuhan 430205, China

|                                                                                 |         |
|---------------------------------------------------------------------------------|---------|
| 1. Absorbance and emission spectra of NCS-BOD-OCH <sub>3</sub> .....            | S1      |
| 2. Up-converted fluorescence emission spectra of NCS-BOD-OCH <sub>3</sub> ..... | S2      |
| 3. <sup>1</sup> H NMR spectra of compound NH <sub>2</sub> -BODIPY.....          | S3      |
| 4. <sup>1</sup> H NMR spectra of compound NCS-BODIPY.....                       | S4      |
| 5. <sup>1</sup> H NMR spectra of compound NCS-BOD-OCH <sub>3</sub> .....        | S5      |
| 6. <sup>13</sup> C NMR spectra of compound NH <sub>2</sub> -BODIPY.....         | S6      |
| 7. <sup>13</sup> C NMR spectra of compound NCS-BODIPY.....                      | S7      |
| 8. <sup>13</sup> C NMR spectra of compound NCS-BOD-OCH <sub>3</sub> .....       | S8      |
| 9. HRMS spectra of compound NH <sub>2</sub> -BODIPY.....                        | S9      |
| 10. HRMS spectra of compound NCS-BODIPY.....                                    | S10     |
| 11. DFT calculations of different parts of the probe.....                       | S11     |
| 12. Comparison with some published research work.....                           | Table 1 |

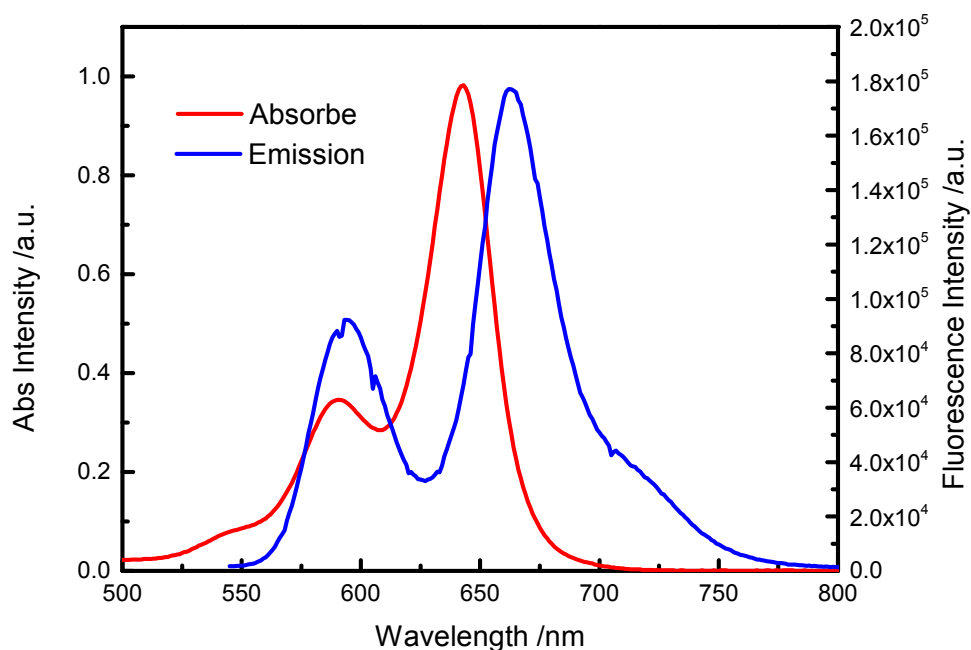

**Figure S1** The absorbance and emission spectra of NCS-BOD-OCH<sub>3</sub> (1×10<sup>-5</sup> mol/L) in solvent H<sub>2</sub>O/THF = 1 : 1; pH = 7.4 PBS buffer.

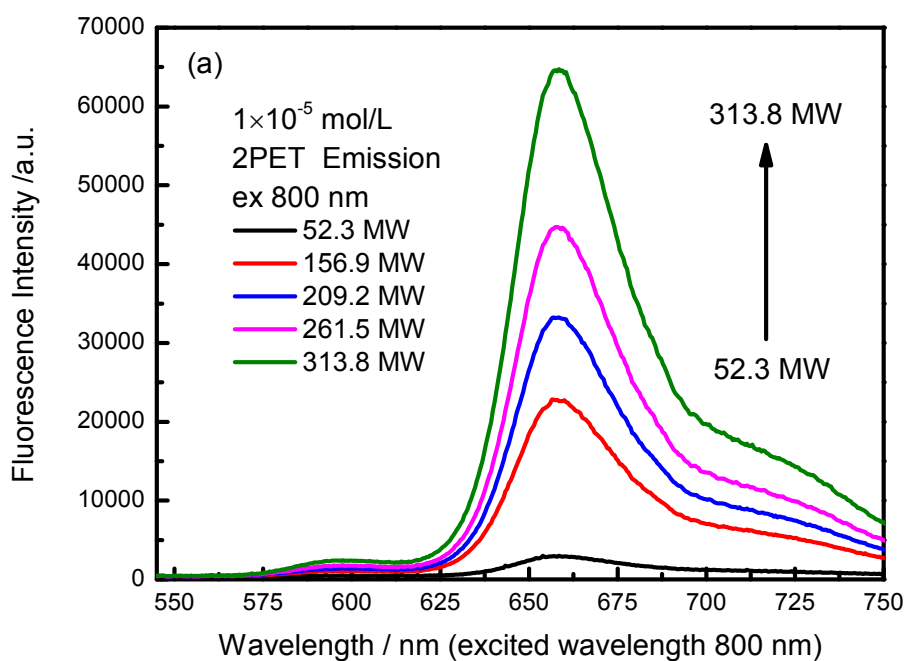

**Figure S2** Up-converted fluorescence emission spectra of NCS-BOD-OCH<sub>3</sub> (1×10<sup>-5</sup> mol/L) under different power laser in solvent H<sub>2</sub>O/THF = 1 : 1.

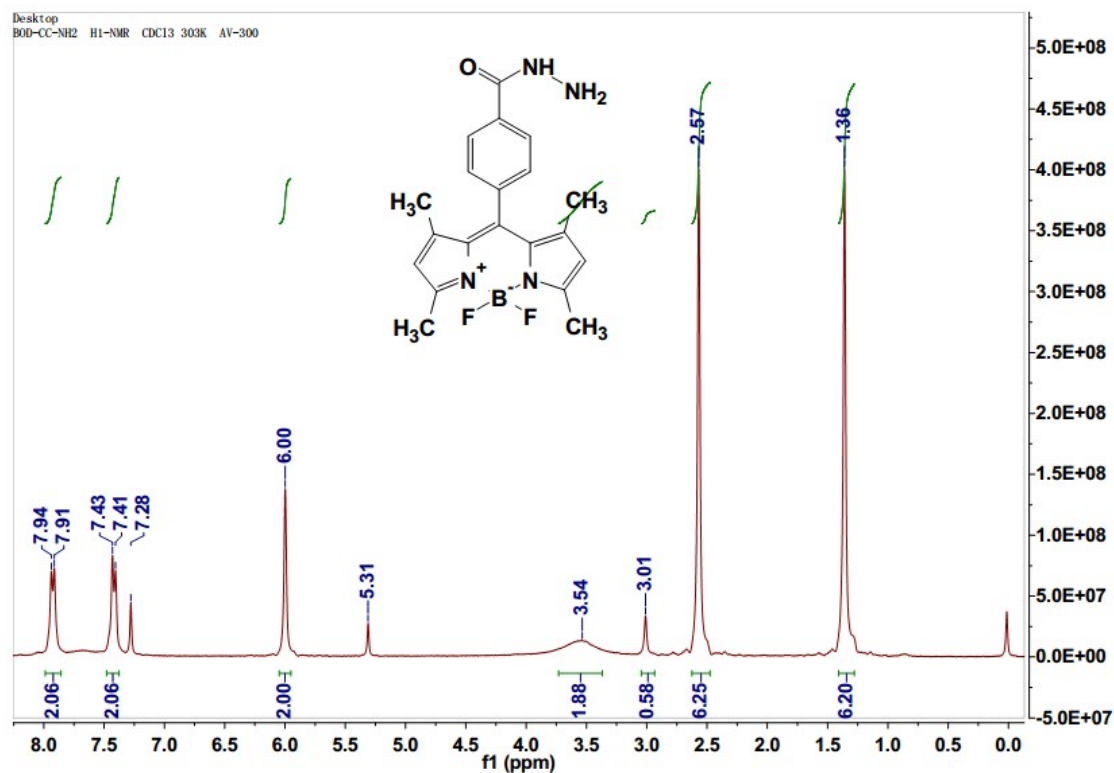

Figure S3.  $^1\text{H}$  NMR spectra of compound  $\text{NH}_2\text{-BODIPY}$

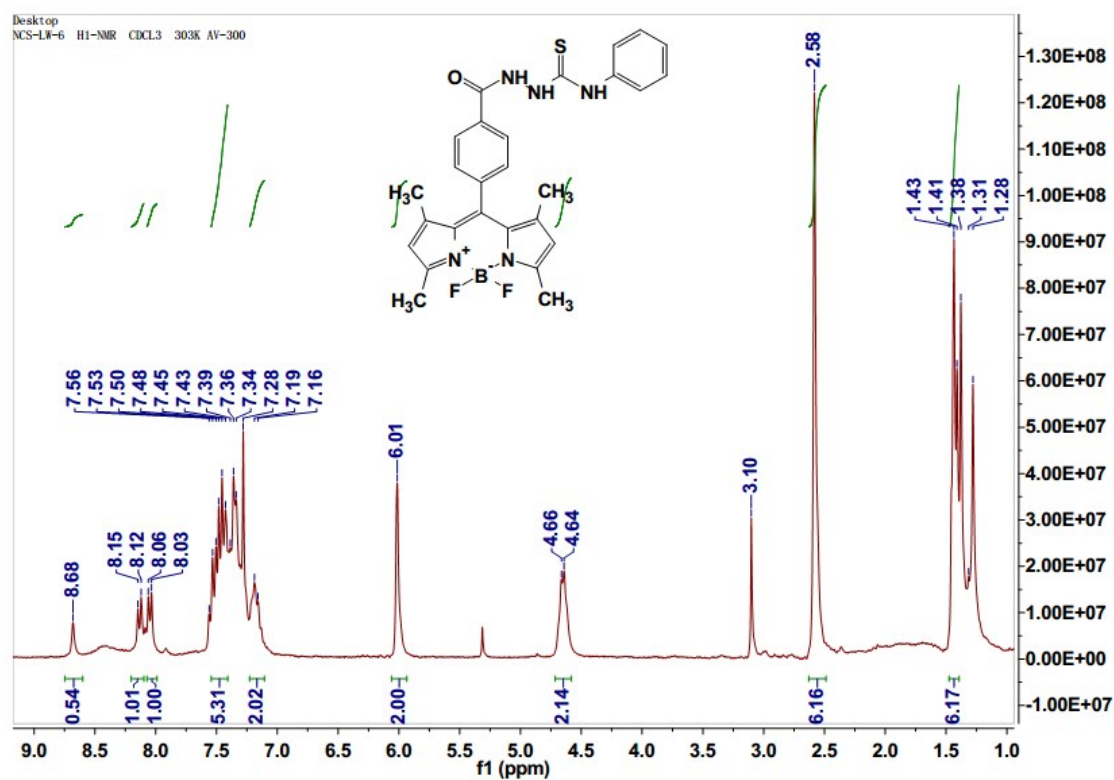

Figure S4.  $^1\text{H}$  NMR spectra of compound  $\text{NCS-BODIPY}$

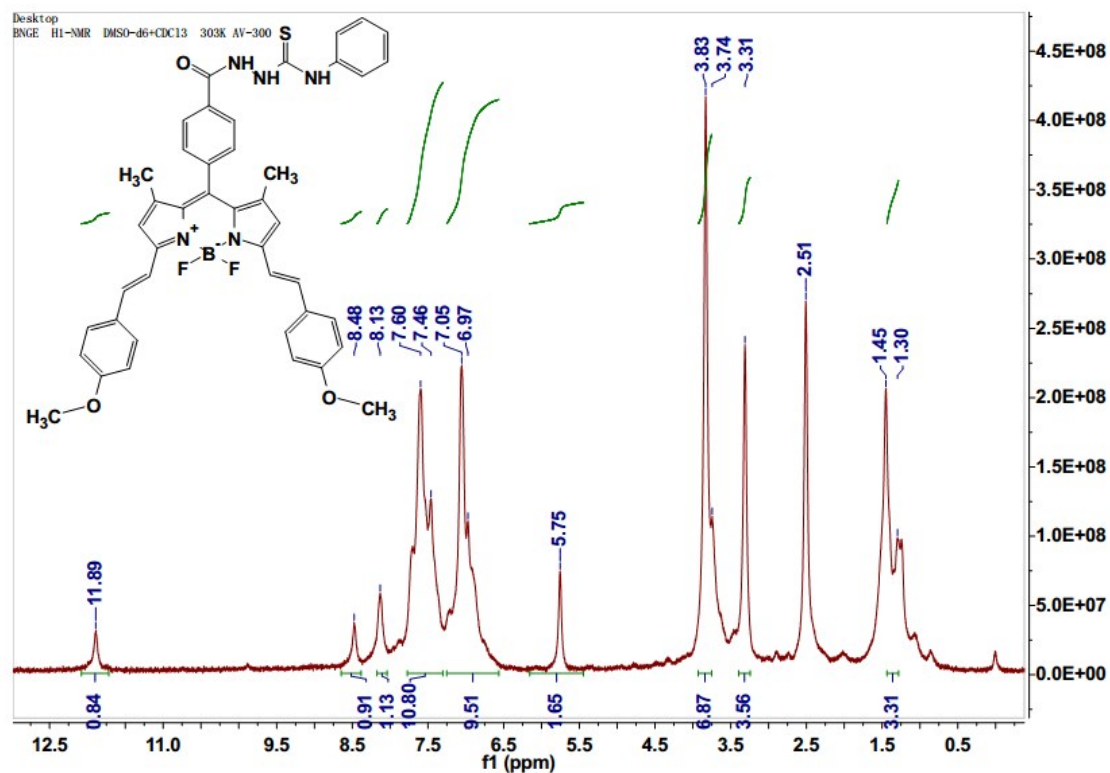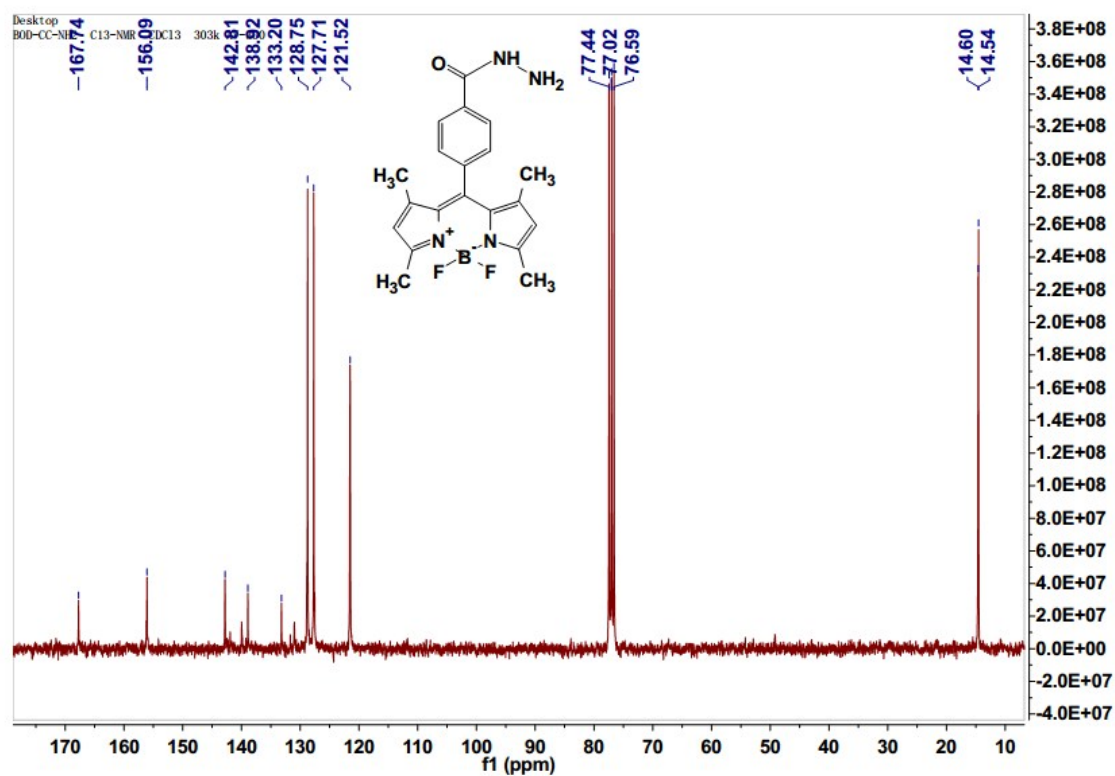

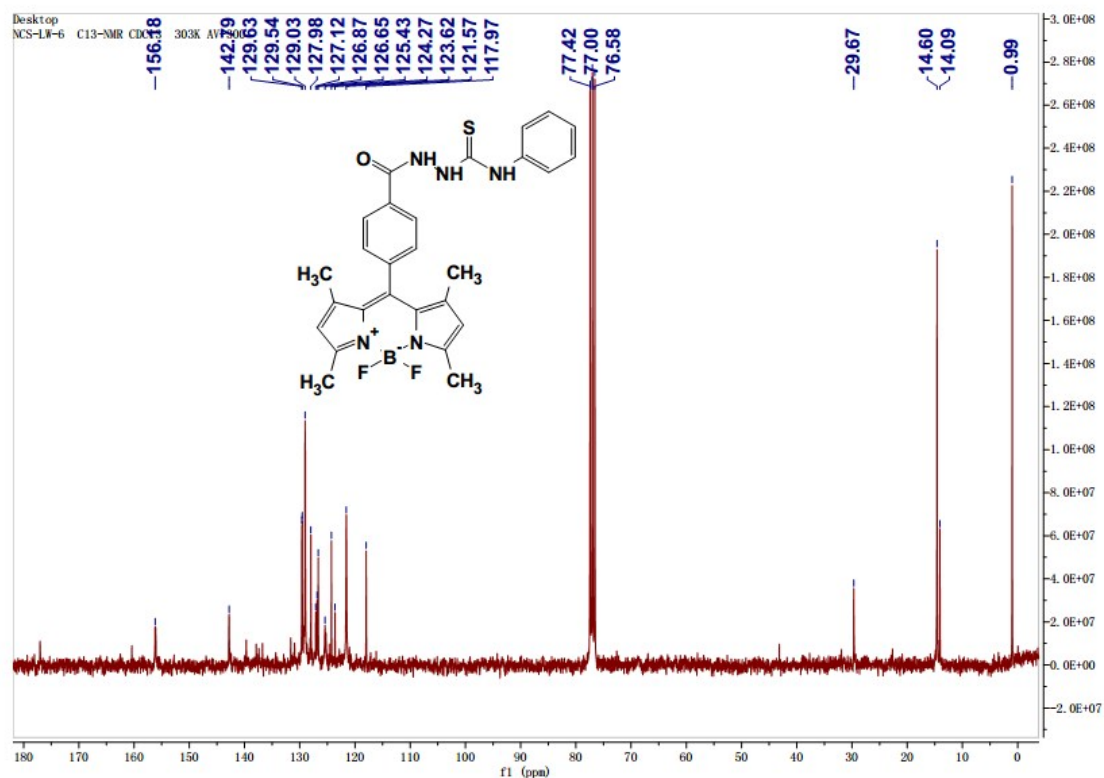

**Figure S7.**  $^{13}\text{C}$  NMR spectra of compound **NCS-BODIPY**

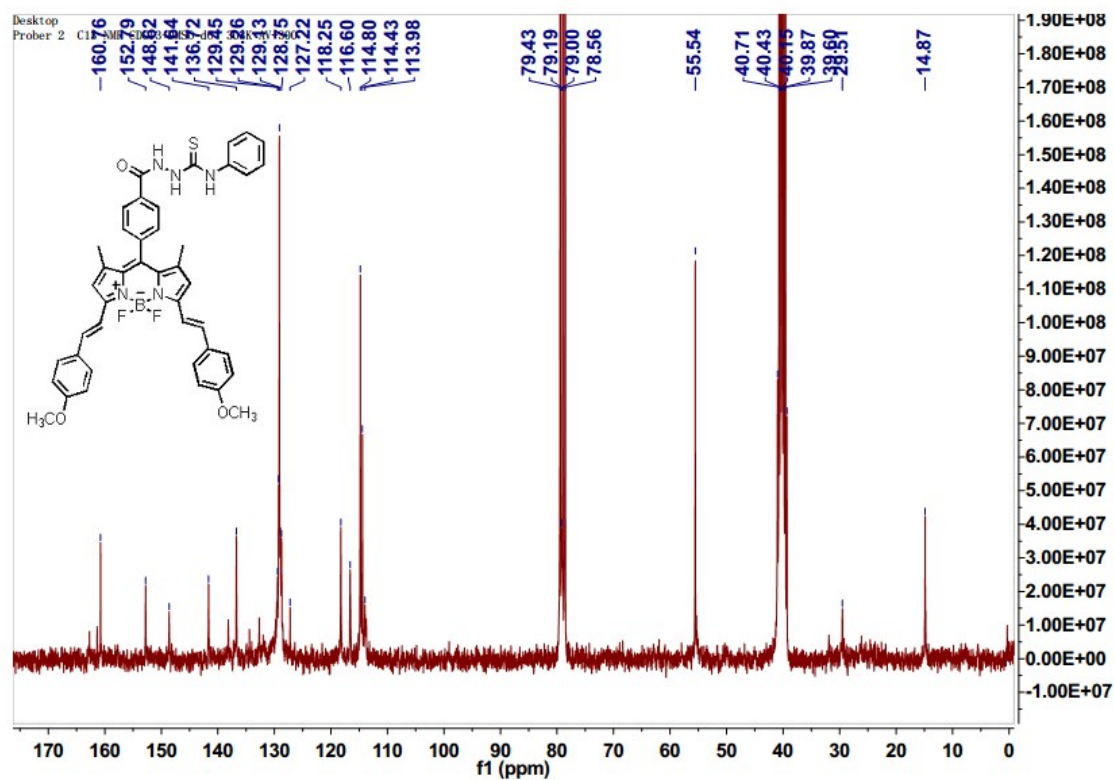

**Figure S8.**  $^{13}\text{C}$  NMR spectra of compound **NCS-BOD-OCH<sub>3</sub>**

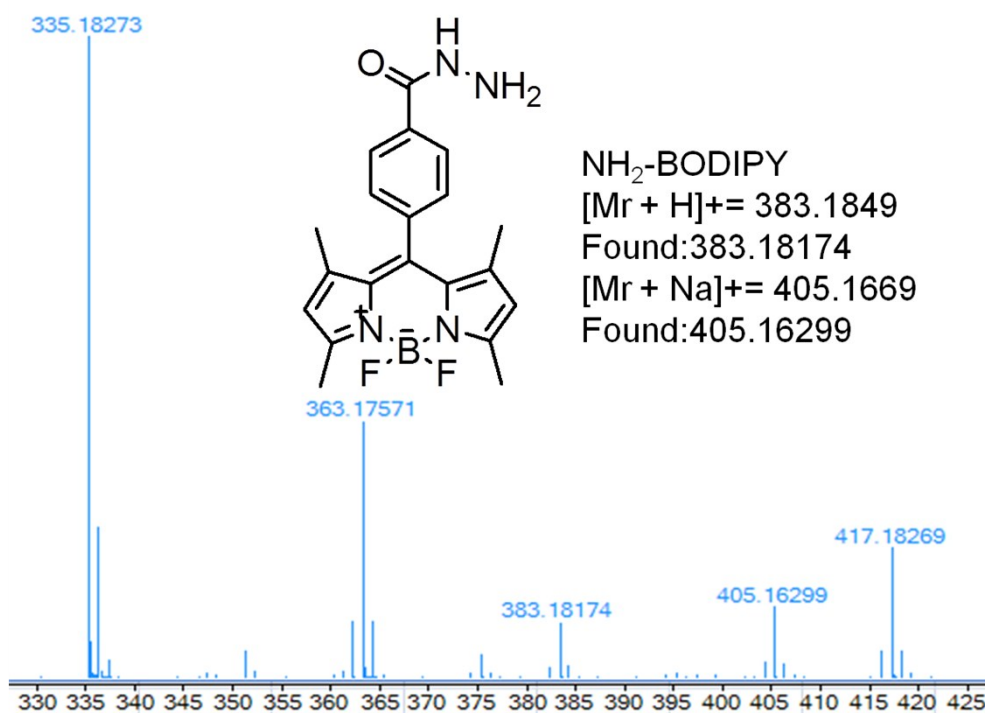

**Figure S9.** HRMS spectra of **NH<sub>2</sub>-BODIPY**

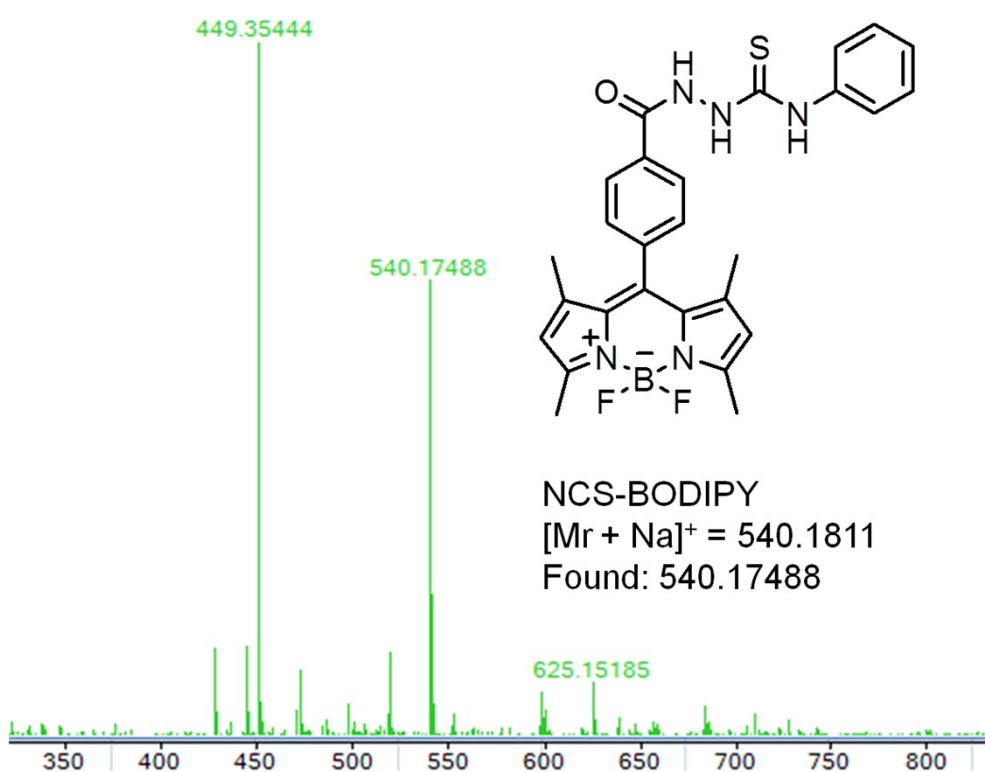

**Figure S10.** HRMS spectra of **NCS-BODIPY**

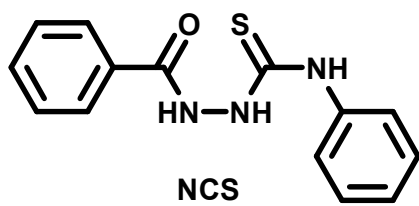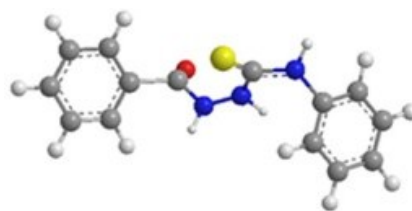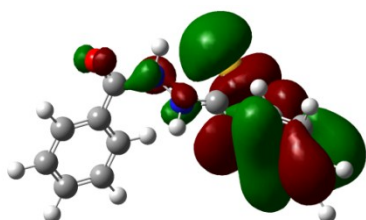

HOMO (-5.3 eV)

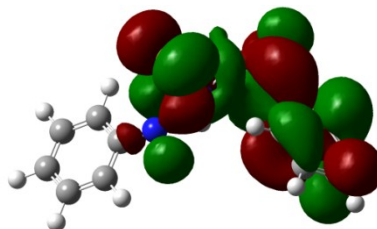

LUMO (-1.823 eV)

DFT calculations of NCS structure

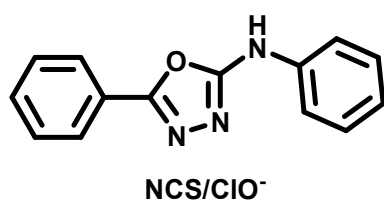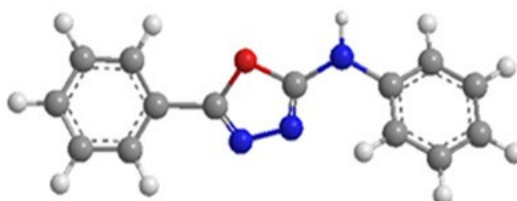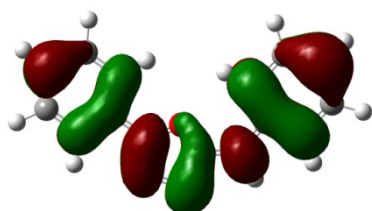

HOMO (-5.39 eV)

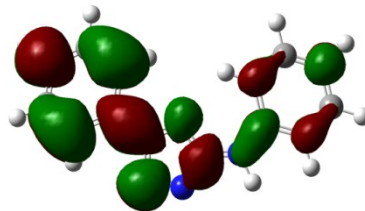

LUMO (-0.87) eV

DFT calculations of NCS after reacting with ClO<sup>-</sup>

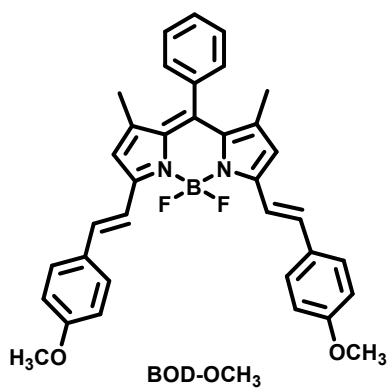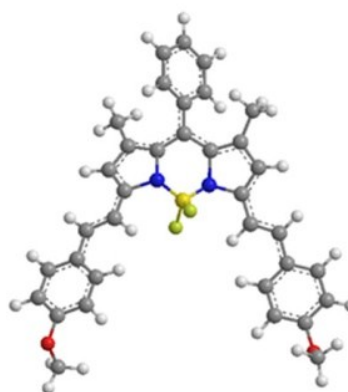



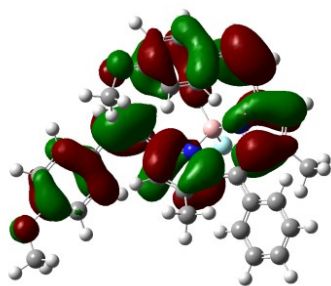

HOMO -4.79 eV

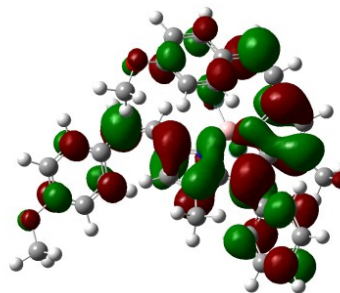

LUMO -2.72 eV

DFT calculations of BOD-OCH<sub>3</sub> structure

**Figure S11** The DFT calculations of different parts of NCS-BOD-OCH<sub>3</sub> based on B3LYP/6-31G(d) basis set.

**Table 1** Comparison with some published research work

| Compounds                                                                           | $\lambda_{em}$ (nm) | LOD                     | Detection time |
|-------------------------------------------------------------------------------------|---------------------|-------------------------|----------------|
| 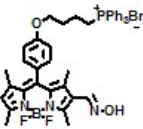 | 529                 | $2.5 \times 10^{-7}$ M  | Within 125 s   |
|  | 501/578             | $2.4 \times 10^{-8}$ M  | 60 s           |
|  | 527                 | $4 \times 10^{-6}$ M    | 600 s          |
|  | 595/665             | $1.15 \times 10^{-6}$ M | 540 s          |
